# Supplementary material
Source: PubMed Central journal article supplement (PMC5920796)
Supplement: NIHMS923618-supplement-Supporting_Information.pdf [file NIHMS923618-supplement-Supporting_Information.pdf]

---

## Supporting Information

# G-quadruplex secondary structure from circular dichroism spectroscopy

Rafael del Villar-Guerra, John O. Trent\* and Jonathan B. Chaires\*

James Graham Brown Cancer Center

University of Louisville

505 S. Hancock St., Louisville, KY 40202 (USA)

\* E-mail: j.chaires@louisville.edu, john.trent@louisville.edu

**Abstract:** A curated library of circular dichroism spectra of 23 G-quadruplexes of known structure was built and analyzed. The goal of this study was to use this reference library to develop an algorithm to derive quantitative estimates of the secondary structure content of quadruplexes from their experimental CD spectra. Principal component analysis and singular value decomposition were used to characterize the reference spectral library. CD spectra were successfully fit to obtain estimates of the amounts of base steps in *anti-anti*, *syn-anti* or *anti-syn* conformations, in diagonal or lateral loops or in other conformations. The results show that CD spectra of nucleic acids can be analyzed to obtain quantitative structural information about secondary structure content in an analogous way to methods used to analyze protein CD spectra.

**DOI:** 10.1002/anie.2016XXXXX

---

## Table of Contents

1. REFERENCE G-QUADRUPLEX CIRCULAR DICHROISM SPECTRA
2. DEFINITION OF SECONDARY STRUCTURE ELEMENTS OF QUADRUPLEX.
3. PRINCIPAL COMPONENT ANALYSIS (PCA) AND CLUSTER ANALYSIS.
4. SINGULAR VALUE DECOMPOSITION (SVD)
5. MINIMUM NUMBER OF BASIS SPECTRA
6. QUANTITATIVE ANALYSIS CD SPECTRA OF G-QUADRUPLEX DNA: ESTIMATION OF SECONDARY STRUCTURE
7. ACCURACY OF THE PREDICTION METHOD.
8. TABLES AND FIGURES
9. REFERENCES

## Experimental Procedures

### 1. REFERENCE G-QUADRUPLEX CIRCULAR DICHROISM SPECTRA

Oligonucleotide sequence, length, molecularity, topology and the Protein Data Bank code (ID PDB) for the dataset of 23 G-quadruplex DNA (G4-DNA) used in this work are given in Table S1. Oligonucleotides were purchased from Integrated DNA Technologies (Coralville, IA) with standard desalting and dissolved at a concentration of ~1mM. The buffer composition used for the folding and dilution of the oligonucleotides were identical to those reported for the structure determination (Table S1).

CD spectra were measured for each sequence, after appropriate annealing and sample preparation, under solution conditions identical to those used in the original structural determination using published protocols developed in our laboratory.<sup>[1]</sup> Sample homogeneity was confirmed by sedimentation velocity experiments as previously described.<sup>[2]</sup> In only one case (sample 186D) was significant heterogeneity observed, requiring additional purification by SEC (size exclusion chromatography) methods developed and reported.<sup>[3]</sup>

Circular dichroism (CD) and absorbance spectra were recorded in a 1-cm path length cuvette at 20 °C with a Jasco J-810 spectropolarimeter (Jasco, Easton, MD) equipped with a Peltier temperature controller with a concentration of 1-5 μM per quadruplex. The CD spectrum for the oligonucleotide 1134 correspond to the spectra recorded at 4 °C and the spectrum for the oligonucleotide 186D correspond to the fraction with a sedimentation coefficient ( $s_{20,w}$ ) of 1.9 obtained after purification by SEC (size exclusion chromatography). The absorbance at 260 nm of the samples used for CD experiments were ~ 0.7-1. The typical instrumental parameters to record the CD spectra were: 220-340 nm measurement range, 0.5 or 1 nm data pitch, 2 nm band width, 0.5 sec response, standard sensitivity, 100 or 200 nm/min of scanning speed. To obtain the CD reference spectra four spectra were averaged and the spectral contribution from the buffer was subtracted.

CD spectra were normalized to  $\Delta\epsilon$  ( $M^{-1}\cdot cm^{-1}$ ) =  $\theta/(32980*c*l)$  based on G-quadruplex strand concentration, where  $\theta$  is the CD ellipticity in millidegrees,  $c$  is DNA concentration in mol/L, and  $l$  is the path length in cm. The DNA concentrations were calculated from the 260 nm absorbance using the molar extinction coefficient listed in Table S1. The molar concentration of DNA was expressed per quadruplex.

All the CD spectra were arranged as **C** matrix in the form that the each column contain the CD spectra of the corresponding G-quadruplex in the range of 220-330 nm at 1 nm increments. To obtain equal increments of 1 nm between points interpolation of some spectra was necessary.

## 2. DEFINITION OF SECONDARY STRUCTURE ELEMENTS OF QUADRUPLEX.

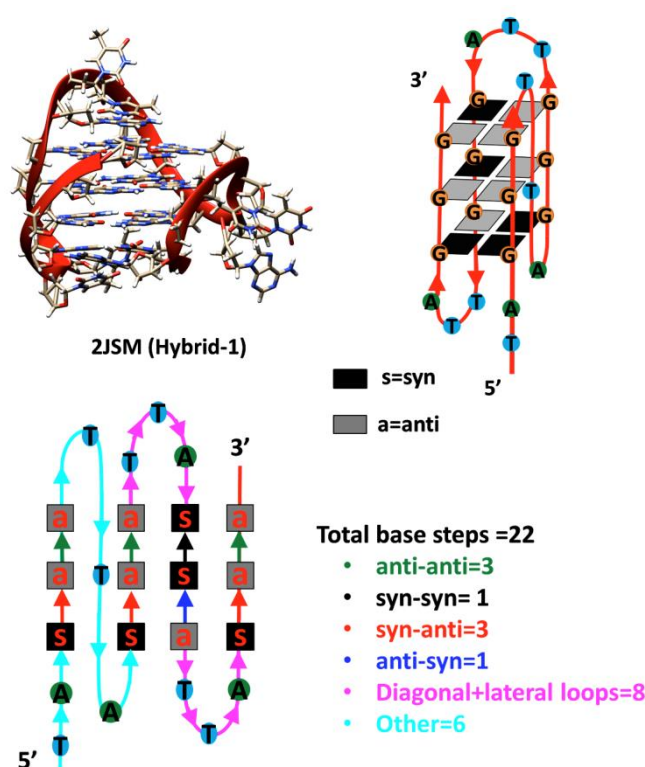

**Figure S1.** Schematic illustration for the definition of the secondary structure elements of G-quadruplex used in this study.

The fraction of secondary structural elements of G-quadruplex were determined by the visual inspection of the corresponding structures deposited in the PDB data bank (Table S4). These fractions were calculated by normalizing the values to the total number of nucleotide base steps in their structures. In the case of NMR structures, the first model of the PDB file was used for the determination of the structural elements. Only the monomeric quadruplex structure observed in the asymmetric unit were considered for the structural analysis when more than one crystal structure was found (PDB files 1S45 and 2AVH). The quantification of the secondary structure elements was done following the geometric formalism for the description of DNA G-quadruplexes topologies previously described.<sup>[4]</sup> The schematic models of G-quadruplex aligned according to the frame of reference to obtain the fractions of the secondary structural elements are showed in Figure S1. The progression from 5' to 3' end of the first strand (blue line) of the G-quartets aligned according to the frame of reference was used as a criterion to define the polarity of the G-G stacking base steps.<sup>[4b]</sup> These secondary structural fractions define the structural matrix, **F**, that was used for the calculation of the G-quadruplex secondary structure basis CD spectra (Table S4).

---

### 3. PRINCIPAL COMPONENT ANALYSIS (PCA) AND CLUSTER ANALYSIS.

The multivariate data analysis, principal component and cluster analysis of the G-quadruplex CD spectral library was performed with R software<sup>[5]</sup>, R version 3.3.2 (2016-10-31), using the R package called FactoMineR.<sup>[6]</sup> This software and the package are freely available from the Comprehensive R Archive Network (CRAN) at <http://cran.r-project.org>. The CD spectra were scaled to unit variance before the analysis.

Hierarchical clustering on principal components (HCPC)<sup>[7]</sup> was performed onto the first five principal components using the Euclidean distance as a measure of similarity between individuals, and the Ward criterion as agglomeration method. The initial clusters obtained by hierarchical clustering (HC) were further consolidated by partitional clustering using the *k*-means algorithm. The results of the cluster analysis are presented as a dendrogram. In the dendrogram, the horizontal axis represents the PDB code of each G-quadruplex and the vertical axis represents the degree of similarity of the individuals. The individuals are colored according to their belonging to a cluster and the center of each cluster was represented by larger point size in the biplot graph. The selection of the optimal number of clusters was determined automatically using the gain in within inertia criterion.<sup>[7]</sup>

The *v*-test value of the wavelengths (variables) and the associated *p*-value was obtained as outputs of the function HCPC within statistical package FactoMineR.<sup>[6]</sup> The *v*-values were used as a tool to select the most statistically significant set of variables that are able to characterize each cluster (Figure S2).<sup>[8]</sup>

### 4. SINGULAR VALUE DECOMPOSITION (SVD)

The mathematical details of the SVD analysis have been already described.<sup>[9]</sup> For the SVD analysis, the CD spectra of our G-quadruplexes reference library were arranged in a matrix, **C**, of 23 columns. SVD decomposition of the matrix, **C**, was carried out using the software Matlab 7.1.0.246 (The MathWorks, Inc., 2005).

### 5. MINIMUM NUMBER OF BASIS SPECTRA

The original CD spectra matrix, **C**, was reconstructed by using only the  $\mu$  most significant singular values and CD eigenvectors by  $C_{\mu}=U_{\mu}S_{\mu}V_{\mu}^T$ , where  $U_{\mu}$ ,  $S_{\mu}$  and  $V_{\mu}$  are submatrices of **U**, **S** and **V**, respectively, corresponding to the first  $\mu$  basis components. This linear combination  $C_{\mu}=U_{\mu}S_{\mu}V_{\mu}^T$  provides the best least-squares approximation to the matrix **C** having a rank  $\mu$ . The number of significant basis spectra and the information contained in the CD spectral matrix, **C**, was determined by evaluating several statistical parameters such as: the relative magnitude of the singular values, their contribution to the total variance of the data set, the values of the autocorrelation function for the columns of the **U** and the **V** matrices, the variance in the dataset unaccounted ( $\sigma^2$ ) for reconstructing the original matrix (**C**),<sup>[10]</sup> and the spectral root mean squared (RMS) difference in comparison with the noise level of the CD spectra (see Figures S3-7 and Tables S2-3). The noise level of the CD spectra was determined by standard deviation in the range of 320-340 nm, where no CD signal was observed for any of the G-quadruplexes.

The contribution of each singular value to the total variance of the data set (relative variance, RV) for the first ten significant components of the CD spectra were calculated by Equation S1.<sup>[9b]</sup>

$$RV = \frac{S_i^2}{\sum_i S_i^2}$$

**Equation S1**

where  $S_i^2$  is the square of the singular value. The relative importance of each column of  $\mathbf{U}$ , as a component of the original protein CD spectra, can be estimated by the magnitude of the singular values.<sup>[10c]</sup>

The values of the autocorrelation function for the columns of the  $\mathbf{U}$  and the  $\mathbf{V}$  matrices were calculated as described previously.<sup>[9b]</sup>

The variance in the dataset unaccounted ( $\sigma^2$ ) for reconstructing the original matrix,  $\mathbf{C}=\mathbf{U}_\mu\mathbf{S}_\mu\mathbf{V}_\mu^T$ , were calculated by Equation S2, when only the  $\mu$  most significant basis CD spectra were used.<sup>[10b, c]</sup>

$$\sigma_\mu^2 = \left( \frac{1}{N(m - \mu)} \right) \sum_{i=\mu+1}^m s_i^2$$

**Equation S2**

where  $\mathbf{C}$  is the matrix containing the reference CD spectra library of G-quadruplexes in its columns,  $\sigma^2$  is the variance unaccounted for reconstructing the matrix  $\mathbf{C}$ ,  $s_i$  is the  $i^{\text{th}}$  singular value of  $\mathbf{S}$ ,  $\mu$  is the number of basis spectra used for the reconstruction of the original spectra,  $m$  is the number of reference spectra and  $N$  is the number of spectral data points.<sup>[10b]</sup>

## 6. QUANTITATIVE ANALYSIS CD SPECTRA OF G-QUADRUPLEX DNA: ESTIMATION OF SECONDARY STRUCTURE

Secondary structure CD spectra were calculated using singular value decomposition (SVD) and generalized inverse (Moore-Penrose pseudoinverse) methods on the matrix of the reference CD spectra of 23 G-quadruplex ( $\mathbf{C}$ ) with known secondary structures ( $\mathbf{F}$ ). The method to obtain secondary structure CD spectra of G-quadruplex is similar to that used with proteins and only the basic formulas of these methods will be described.<sup>[1], [1c]</sup>

The method assumes that the CD spectrum of a G-quadruplex can be represented as a linear combination of secondary structural basis spectra.

$$C_\lambda = \sum_i f_i \cdot B_{\lambda,i} + noise$$

**Equation S3**

where  $C_\lambda$  is the CD spectrum of a G-quadruplex as function of the wavelength,  $f_i$  is the fraction of the  $i^{\text{th}}$  secondary structural element, and  $B_{\lambda,i}$  is the basis spectrum corresponding to the  $i^{\text{th}}$  secondary structure element.

The set of linear equations can be represented in a matrix notation as  $\mathbf{C}=\mathbf{B}\mathbf{F}$ , where  $\mathbf{C}$  is the  $\lambda \times 23$  matrix of 23 G-quadruplex CD spectra,  $\mathbf{B}$  is the  $\lambda \times 5$  matrix of basis CD spectra for each secondary structure element expressed as column, and  $\mathbf{F}$  is the  $5 \times 23$  matrix of the fractions of each secondary structure element considered (Table S4).

The matrix equation relating the CD spectra to the secondary structure elements is  $\mathbf{F}=\mathbf{X}_\mu\mathbf{C}$ , where  $\mathbf{C}$  is the reference set of CD spectra of the known G-quadruplexes,  $\mathbf{F}$  their corresponding known fractions of secondary structural elements (Table S4), and  $\mathbf{X}_\mu$  the unknown matrix of vectors which relate  $\mathbf{C}$  and  $\mathbf{F}$ .<sup>[1e]</sup> The  $\mathbf{X}_\mu$  matrix correspond to the generalized inverse of the basis CD spectra of the secondary structures elements calculated as  $\mathbf{X}_\mu=\mathbf{F}\mathbf{C}_\mu^{-1}$ . The inverse of the reference G-quadruplex CD spectra matrix,  $\mathbf{C}_\mu^{-1}$ , was calculated using SVD analysis with only the five ( $\mu=5$ ) most significant singular values and CD

eigenvectors,  $\mathbf{C}_\mu^{-1} = \mathbf{V}_\mu \mathbf{S}_\mu^+ \mathbf{U}_\mu^T$ , where  $\mathbf{U}_\mu$ ,  $\mathbf{S}_\mu$  and  $\mathbf{V}_\mu$  are submatrices of  $\mathbf{U}$ ,  $\mathbf{S}$  and  $\mathbf{V}$ , respectively. Once the  $\mathbf{X}_\mu$  matrix was obtained,  $\mathbf{X}_\mu = \mathbf{F} \mathbf{C}_\mu^{-1} = \mathbf{F} \mathbf{V}_\mu \mathbf{S}_\mu^+ \mathbf{U}_\mu^T$ , the fractions of secondary structure ( $\mathbf{F}_{\text{calc}}$ ) corresponding to the test G-quadruplex CD spectrum ( $\mathbf{C}_{\text{unk}}$ ) can be estimated.

Constrained least-square fitting of the test G-quadruplex CD spectrum ( $\mathbf{C}_{\text{unk}}$ ) to five basis spectra ( $\mathbf{B}$ ) was used to predict the secondary structure fraction ( $\mathbf{F}_{\text{calc}}$ ) such that

$$\min \left\| \mathbf{C}_{D_{\text{unk}}} - \sum_{i=1}^5 f_{\text{calc},i} \cdot \mathbf{B}_{\lambda,i} \right\|^2$$

$$0.99 \leq \sum_{i=1}^5 f_{\text{calc},i} \leq 1.01$$

$$0.00 \leq f_{\text{calc},i} \leq 1.00$$

#### Equation S4

where  $\mathbf{C}_{D_{\text{unk}}}$  is a column vector corresponding to the test G-quadruplex CD spectrum,  $f_{\text{calc},i}$  is the estimated fraction of the  $i^{\text{th}}$  secondary structural element, and  $\mathbf{B}_{\lambda,i}$  is a column vector corresponding to the  $i^{\text{th}}$  secondary structure basis spectra. The basis spectra corresponding to the secondary structure elements were calculated by  $\mathbf{B} = \mathbf{X}_\mu^+$ , (Figure S8) where the columns of the matrix  $\mathbf{B}$  correspond to the five secondary structure basis CD spectra and  $\mathbf{X}_\mu^+$  is the Moore-Penrose pseudoinverse of the matrix  $\mathbf{X}_\mu$ . The minimization process was performed with open source R software<sup>[2]</sup>, R version 3.3.2 (2016-10-31), using the function “lsqincon” from the R package “pracma” for solving quadratic programming problems in the presence of bound and linear constraints. The linear constraint used was that the sum of the secondary structures cannot be less than 0.99 or higher than 1.01. The bound constraints used was that the values of the secondary structures fractions cannot be negative or higher than 1.00.

The estimated fractions of each secondary structure ( $\mathbf{F}_{\text{calc}}$ ) were used to reconstruct the test CD spectrum of the G-quadruplex by using the equation  $\mathbf{C}_{\text{res}} = \mathbf{B} \mathbf{F}_{\text{unk}}$ , where  $\mathbf{C}_{\text{res}}$  is the fitted CD spectrum,  $\mathbf{B}$  is the matrix with the five secondary structure basis CD spectra, and  $\mathbf{F}_{\text{calc}}$  is the predicted fraction of the secondary structure elements.<sup>[12]</sup>

The estimated secondary structure fraction reported in this work for all G-quadruplex of the reference library were calculated performing a leave-one-out cross-validation by using the five ( $\mu=5$ ) most significant secondary structure basis spectra (Table S5). To carry out this leave-one-out cross-validation, the spectrum ( $\mathbf{C}_{\text{unk}}$ ) and the secondary structural elements ( $\mathbf{F}_{\text{unk}}$ ) of the test G-quadruplex were removed from the corresponding reference CD spectra matrix,  $\mathbf{C}$ , and from the reference secondary structure fractions matrix,  $\mathbf{F}$ . Then, the generalized inverse CD spectra matrix,  $\mathbf{X}_\mu = \mathbf{F} \mathbf{C}_\mu^{-1}$ , was constructed using the remaining G-quadruplex CD spectra and the corresponding secondary structural element fractions. Once the  $\mathbf{X}_\mu$  matrix was obtained, constrained least-square fitting of the test G-quadruplex CD spectrum ( $\mathbf{C}_{\text{unk}}$ ) to five basis spectra ( $\mathbf{B}$ ), calculated using the generalized inverse,  $\mathbf{B} = \mathbf{X}_\mu^{-1}$ , was performed. This procedure was repeated one after another for each test G-quadruplex in the data set.

The fitting of G-quadruplex CD spectra described here was implemented in the open source R software environment (<https://www.r-project.org/>)<sup>[2]</sup>, R version 3.3.2 (2016-10-31). Our script is available to interested users upon request.

---

## 7. ACCURACY OF THE PREDICTION METHOD.

The structural root mean squared difference ( $RMSD_{\text{structural}}$ ) (Equation S1), the statistical  $\xi$  parameter,<sup>[13]</sup> the slope and the Pearson correlation coefficient ( $r$ ) between the predicted secondary structural elements and the experimental values determined from the PDB structures was used to evaluate the quality of the prediction method of the structural parameter.

The spectral and/or structural root mean squared (RMSD) difference was calculated by Equation 3 between experimental and the predicted values.

$$RMSD = \sqrt[2]{\left(\frac{\sum_i^N (x_{i,\text{experimental}} - x_{i,\text{predicted}})^2}{N}\right)}$$

**Equation S5**

where the summation in Equation S5 extends over the number of spectral data points ( $N=N_\lambda$ ) when two CD spectra are compared, and over the number of secondary structure classes ( $N=N_{\text{class}}$ ) when the structural RMS is calculated. In the case of the structural RMSD,  $x_{i,\text{experimental}}$  is the fraction of secondary structure calculated from the PDB structure and  $x_{i,\text{predicted}}$  is the fraction of secondary structure calculated from CD.

The statistical  $\xi$  parameter ( $\xi = \sigma_{\text{PDB}}/RMSD_{\text{structural}}$ ) was calculated as the standard deviation for a particular secondary structural parameter obtained from the different values observed in the PDB file ( $\sigma_{\text{PDB}}$ ) divided by the structural root mean squared difference of the parameter (RMSD).<sup>[13]</sup>

The goodness of the fitting was calculated by spectral root-mean-square deviation (RMSD, Equation S6) and the normalized root-mean-square deviation (NRMSD) parameter defined by Equation S7<sup>[14]</sup>

$$RMSD = \sqrt[2]{\frac{\sum_N (CD_{\text{exp}} - CD_{\text{calc}})^2}{N}}$$

**Equation S6**

$$NRMSD = \frac{RMSD}{CD_{\text{exp,max}} - CD_{\text{exp,min}}}$$

**Equation S7**

where  $C_{\text{exp}}$  is the experimental spectrum being evaluated,  $CD_{\text{calc}}$  is the calculated spectrum derived from the estimated secondary structure fractions,  $N$  is the number of data points in a spectrum,  $CD_{\text{exp,max}}$  and  $CD_{\text{exp,min}}$  are the largest and smallest intensity observed in the experimental spectrum being evaluated. A low value for the NRMSD ( $>0.1$ ) indicates a small error between the experimental CD spectra and the fitted CD spectra, derived from predicted secondary structure fractions. However, a low NRMSD alone does not mean that an analysis is accurate.<sup>[15]</sup> Therefore, the selection of the best set of secondary structural parameter was based on the overall performance values of these statistical parameters.

## 8. TABLES AND FIGURES

**Table S1.** Reference DNA G-quadruplex oligonucleotides dataset used in the present study.

| PDB ID  | Sequence                           | $\epsilon_{260}$ ( $M^{-1} cm^{-1}$ )<br>per quadruplex | length | Molecularity   | Method | Strand and loop<br>Topology****                            | Ref. |
|---------|------------------------------------|---------------------------------------------------------|--------|----------------|--------|------------------------------------------------------------|------|
| 1EMQ    | 5'-TGGTGGC-3'                      | 203805                                                  | 28     | tetramolecular | NMR    | Parallel (4+0)                                             | [16] |
| 1EVM    | 5'-AGGGT-3'                        | 164564                                                  | 20     | tetramolecular | NMR    | Parallel (4+0)                                             | [17] |
| 1FQP    | 5'-GGGTTTTGGG-3'                   | 173190                                                  | 20     | bimolecular    | NMR    | Antiparallel (2+2)<br>2 diagonal loops                     | [18] |
| 1I34    | 5'-GGTTTTGGCAGGGTTTTGGT-3'         | 154020                                                  | 20     | unimolecular   | NMR    | Antiparallel (2+2)<br>1 propeller loop<br>2 diagonal loops | [19] |
| 1LVS    | 5'-GGGGTTTTGGG-3'                  | 183378                                                  | 22     | bimolecular    | NMR    | Antiparallel (2+2)<br>2 diagonal loops                     | [20] |
| 1NP9    | 5'-TTAGGGT-3'                      | 241628                                                  | 28     | tetramolecular | NMR    | Parallel (4+0)                                             | [21] |
| 1XAV    | 5'-TGAGGGTGGGTAGGGTGGGTA-3'        | 190394                                                  | 22     | unimolecular   | NMR    | Parallel (4+0)<br>3 propeller loops                        | [22] |
| 139D    | 5'-TTGGGGT-3'                      | 247466                                                  | 28     | tetramolecular | NMR    | Parallel (4+0)                                             | [23] |
| 148D    | 5'-GGTTGGTGTGGTTGG-3'              | 142023                                                  | 15     | unimolecular   | NMR    | Antiparallel (2+2)<br>3 lateral loops                      | [24] |
| 186D    | 5'-TTGGGGTTGGGGTTGGGGTTGGGG-3'     | 193875                                                  | 24     | unimolecular   | NMR    | Hybrid-2 (3+1)<br>2 lateral loops<br>1 propeller loop      | [25] |
| 201D    | 5'-GGGGTTTTGGGGTTTTGGGGTTTTGGGG-3' | 241822                                                  | 28     | unimolecular   | NMR    | Antiparallel (2+2)<br>1 diagonal loop<br>2 lateral loops   | [26] |
| 156D    | 5'-GGGGTTTTGGGG-3'                 | 182212                                                  | 24     | bimolecular    | NMR    | Antiparallel (2+2)<br>2 diagonal loop                      | [27] |
| 1S45*   | 5'-TGGGGT-3'                       | 199347                                                  | 24     | tetramolecular | X-Ray  | Parallel (4+0)                                             | [28] |
| 2AVH**  | 5'-GGGGTTGGGG-3'                   | 193611                                                  | 22     | bimolecular    | X-RAY  | Antiparallel (2+2)<br>2 lateral loops                      | [29] |
| 2GKU    | 5'-TTGGGTTAGGGTTAGGGTTAGGGA-3'     | 244300 <sup>[30]</sup>                                  | 24     | unimolecular   | NMR    | Hybrid-1 (3+1)<br>1 propeller loop<br>2 lateral loops      | [31] |
| 2HY9    | 5'-AAAGGGTTAGGGTTAGGGTTAGGGAA-3'   | 278200 <sup>[30]</sup>                                  | 26     | unimolecular   | NMR    | Hybrid-1 (3+1)<br>1 propeller loop<br>2 lateral loops      | [32] |
| 2JSM    | 5'-TAGGGTTAGGGTTAGGGTTAGGG-3'      | 236500 <sup>[30]</sup>                                  | 23     | unimolecular   | NMR    | Hybrid-1 (3+1)<br>1 propeller loop<br>2 lateral loops      | [33] |
| 2JPZ    | 5'-TTAGGGTTAGGGTTAGGGTTAGGGTT-3'   | 261200 <sup>[30]</sup>                                  | 26     | unimolecular   | NMR    | Hybrid-2 (3+1)<br>2 lateral loops<br>1 propeller loop      | [34] |
| 2JSL    | 5'-TAGGGTTAGGGTTAGGGTTAGGGTT-3'    | 253100 <sup>[30]</sup>                                  | 25     | unimolecular   | NMR    | Hybrid-2 (3+1)<br>2 lateral loops<br>1 propeller loop      | [33] |
| 2KF8    | 5'-GGGTTAGGGTTAGGGTTAGGGT-3'       | 223500 <sup>[30]</sup>                                  | 22     | unimolecular   | NMR    | Antiparallel (2+2)<br>1 diagonal loop<br>2 lateral loops   | [35] |
| 2KKA*** | 5'-AGGGTTAGGGTTAGGGTTAGGGT-3'      | 237000 <sup>[30]</sup>                                  | 23     | unimolecular   | NMR    | Antiparallel (2+2)<br>1 diagonal loop<br>2 lateral loops   | [36] |
| 2LD8    | 5'-TAGGGTTAGGGTTAGGGTTAGGG-3'      | 236500                                                  | 23     | unimolecular   | NMR    | Parallel (4+0)<br>3 propeller loops                        | [37] |
| 143D    | 5'-AGGGTTAGGGTTAGGGTTAGGG-3'       | 228500                                                  | 22     | unimolecular   | NMR    | Antiparallel (2+2)<br>1 diagonal loop<br>2 lateral loops   | [38] |

\* Two PDB files 1S45 and 1S47 were found for this oligonucleotide sequence. Only the monomeric quadruplex structures observed in the asymmetric unit of the file 1S45 was considered in this work.

\*\* Two PDB files 2AVH and 2AVJ were found for this oligonucleotide sequence. Only the monomeric quadruplex structures observed in the asymmetric unit of the file 2AVH was considered in this work.

\*\*\* The PDB file of this oligonucleotide present inosine base (I). For recording the CD spectra the inosine (I) was replaced for a guanine. (G).

\*\*\*\* Quadruplex structures are commonly classified according to their strand polarities. The directionalities of the strands are designated as parallel or antiparallel. The descriptor for strand direction (polarity) is defined in the frame of reference relative to the first strand (5' end). Depending on the strand orientation around a core of G-quartets, G-quadruplex can be described as parallel or anti-parallel:

A) Parallel G-quadruplex (4+0), 4 strands parallel + 0 anti-parallel, is formed when all four strands are oriented in the same direction. The structure with all anti-parallel strands (each pair alternating in polarity) is classed as a 2+2 structure. A structure with "all antiparallel" does not exist as antiparallel is comparative to the first strand.



---

B) Anti-parallel Quadruplexes are designated when at least one of the four strands is anti-parallel to the others. This group can be further divided into two different types, depending on the number of parallel and anti-parallel strands. The first type of commonly denominated as antiparallel G-quadruplexes (2+2) is formed when two parallel strands and two antiparallel strands are presented in the quadruplex structure. The second type of antiparallel G-quadruplex structures is known as a hybrid-type (3+1) and occurs when three strands are parallel to each other, while the fourth strand runs in the opposite direction

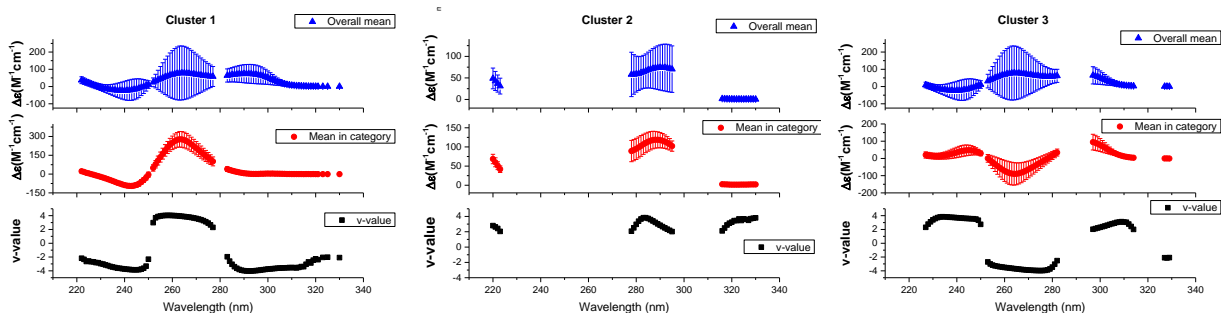

**Figure S2.** Representation of the average CD signal intensity for the whole data set (overall mean, blue), the average of the CD signal intensity in the cluster (mean in the cluster, red) and the v-values (black) calculated for the most significant wavelengths of clusters 1, 2 and 3 obtained from the agglomerative hierarchical clustering analysis (HCA) performed onto the first five principal components (PCs) of the CD spectra data of 23 reference G-quadruplex oligonucleotides. The associated standard deviations are represented by error bars.

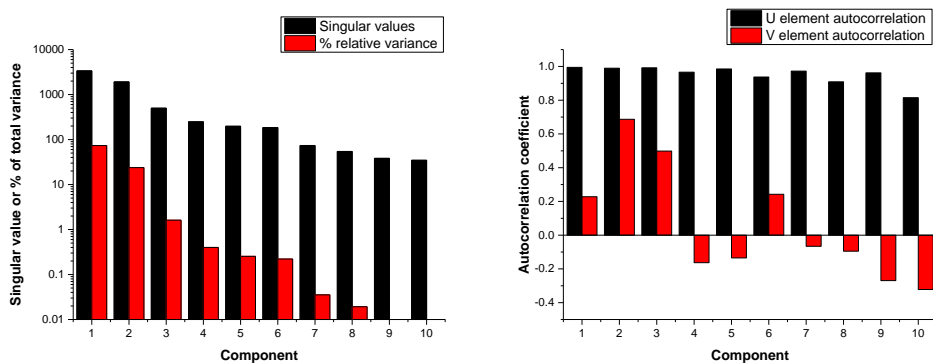

**Figure S3.** Bar graphs showing the singular values and their relative total variance for the first ten components (left) and the autocorrelation coefficients (right) estimated for the first ten significant components of the U and V matrices after performing SVD analysis on the CD spectra matrix (C).

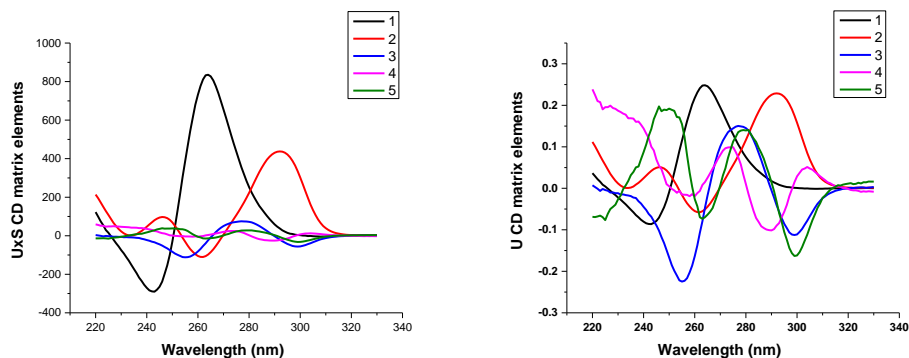

**Figure S4.** Five most significant basis CD spectra generated after performing SVD analysis on the CD spectra matrix (C) of the 23 G-quadruplexes.

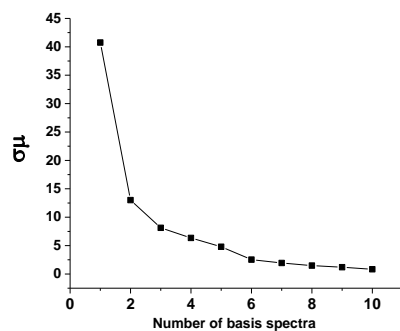

**Figure S5.** The standard deviation  $\sigma_\mu$  unaccounted in the reconstruction of the CD spectra matrix (**C**) of the 23 G-quadruplexes for the first ten significant components.

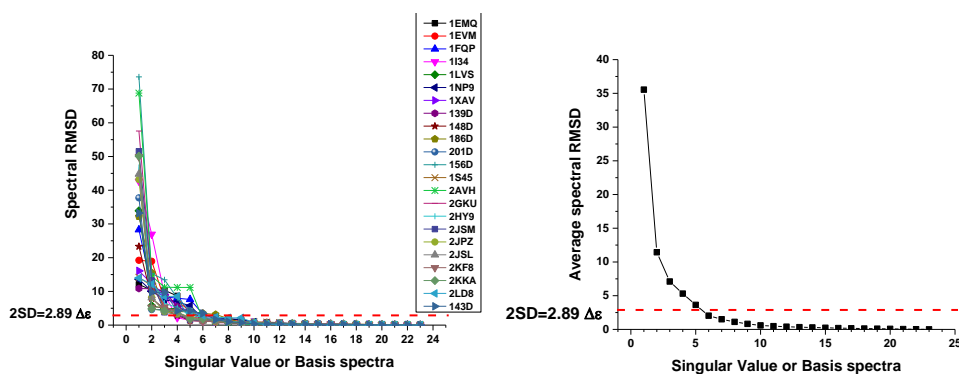

**Figure S6.** Individual (left) and average (right) spectral RMS (root mean squared difference) between reconstructed and original CD spectra as a function of the number of basis spectra or singular values. The dash red line correspond to two standard deviations of the error level ( $2SD=2.89 \Delta\epsilon$  units) determined in the range of 330nm-340nm.

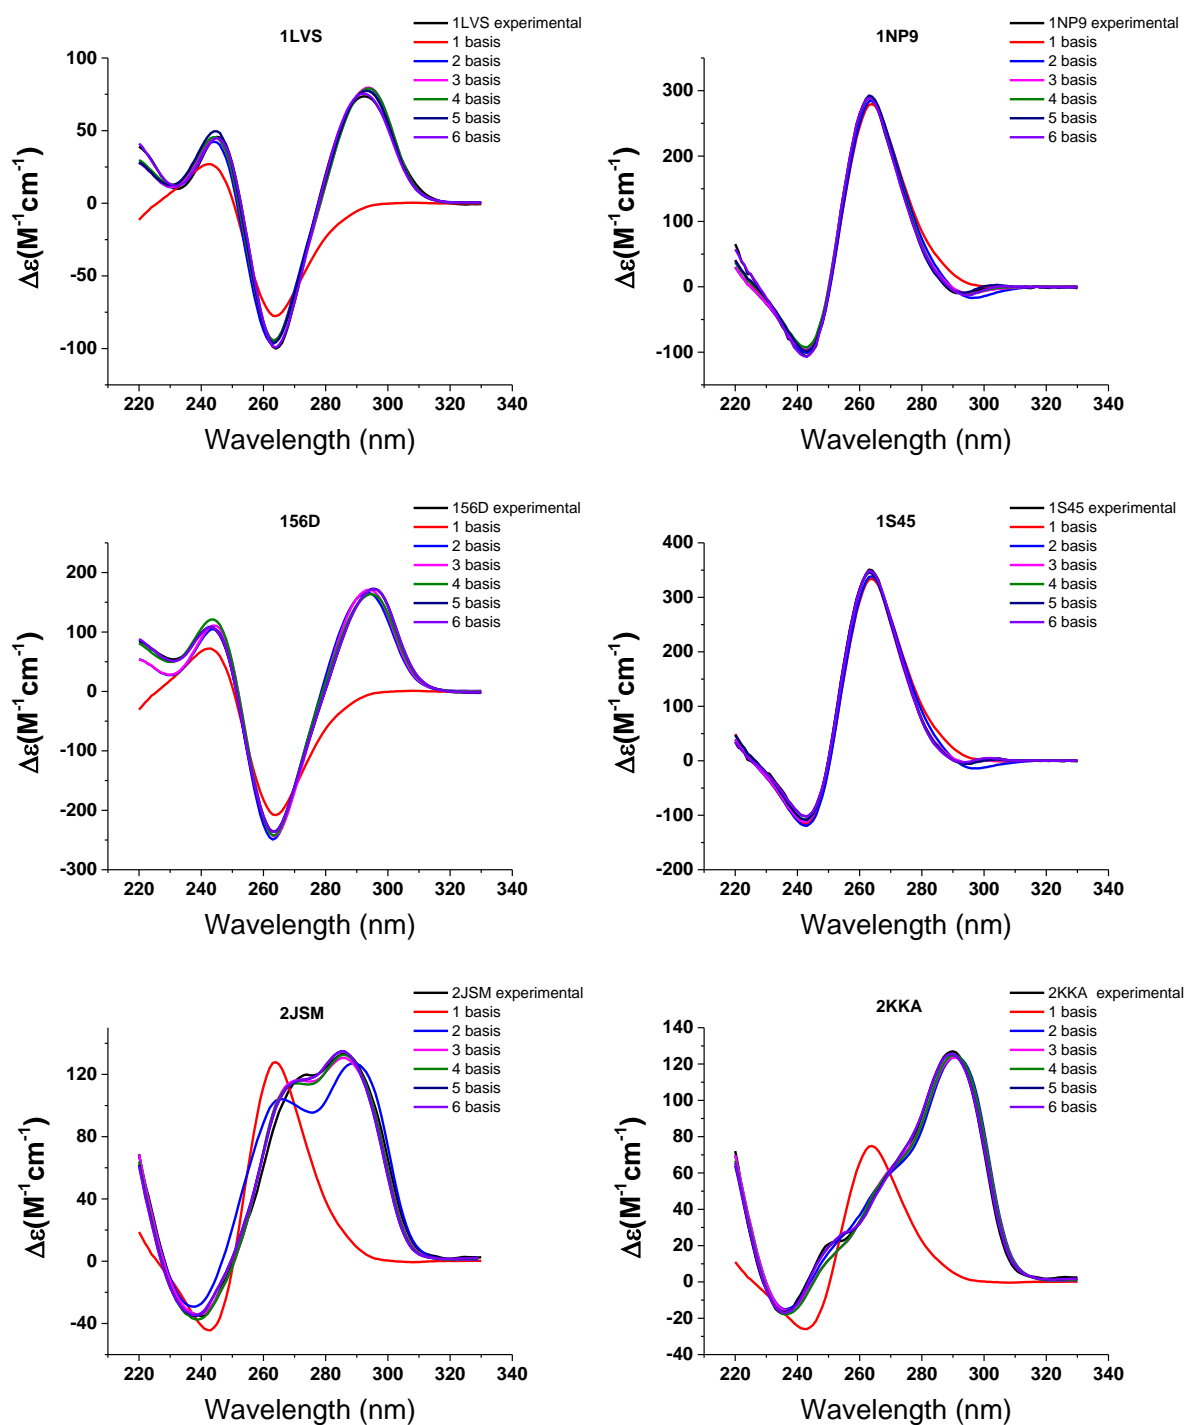

**Figure S7.** Reconstructed CD spectra of G-quadruplexes 1S45, 1I34, 2JPZ, 201D and 1FQP with various numbers of basis spectra: measured CD spectra (green), 1 basis (red), 2 basis (blue), 3 basis (pink), 4 basis (orange), 5 basis (black) and 6 basis (violet). The intensity of the CD spectra was expressed as  $\Delta\epsilon$  ( $M^{-1} cm^{-1}$ ) =  $\theta$ (mdeg)/(32980\*c(mol/Liter)\*L(cm)) where c= concentration per quadruplex in mol/Liter.

**Table S2.** The largest ten singular values, relative variance of each singular value and the standard deviation  $\sigma_{\mu}$

---

| <b>Component</b> | <b>S<br/>singular<br/>values</b> | <b>%<br/>relative<br/>variance</b> | <b><math>\sigma_{\mu}</math></b> |
|------------------|----------------------------------|------------------------------------|----------------------------------|
| 1                | 3364.16                          | 73.62                              | 40.75                            |
| 2                | 1913.16                          | 23.81                              | 13.01                            |
| 3                | 497.97                           | 1.61                               | 8.13                             |
| 4                | 248.10                           | 0.40                               | 6.35                             |
| 5                | 197.46                           | 0.25                               | 4.80                             |
| 6                | 184.46                           | 0.22                               | 2.53                             |
| 7                | 73.74                            | 0.04                               | 1.93                             |
| 8                | 54.38                            | 0.02                               | 1.48                             |
| 9                | 38.28                            | 0.01                               | 1.19                             |
| 10               | 34.63                            | 0.01                               | 0.83                             |

---

**Table S3.** The autocorrelation coefficients estimated for the first ten significant components of the U and V matrices after performing SVD analysis on the CD spectra matrix (C) of the 23 G-quadruplexes.

---

| <b>Component</b> | <b>U<br/>element<br/>autocorrelation</b> | <b>V<br/>element<br/>autocorrelation</b> |
|------------------|------------------------------------------|------------------------------------------|
| 1                | 0.994455                                 | 0.227678                                 |
| 2                | 0.989543                                 | 0.686918                                 |
| 3                | 0.991845                                 | 0.498414                                 |
| 4                | 0.966099                                 | -0.16311                                 |
| 5                | 0.985352                                 | -0.13485                                 |
| 6                | 0.937543                                 | 0.242124                                 |
| 7                | 0.972398                                 | -0.0659                                  |
| 8                | 0.908838                                 | -0.09494                                 |
| 9                | 0.962054                                 | -0.26936                                 |
| 10               | 0.814879                                 | -0.32183                                 |

---

**Table S4.** Fractions of the secondary structural elements of the 23 G-quadplex used in this work. The values were obtained from the visual inspection of the PDB files. The fractions were calculated by normalizing to the total number of base steps in the structure. The base steps G-G of the guanines localized in the loops or the flanking regions were taking into account.

| <b>PDB ID</b> | <b>anti-anti</b> | <b>syn-anti</b> | <b>anti-syn</b> | <b>Diagonal<br/>+ lateral loops</b> | <b>other</b> | <b>Total base steps</b> |
|---------------|------------------|-----------------|-----------------|-------------------------------------|--------------|-------------------------|
| <b>1EMQ</b>   | 0.33             | 0.00            | 0.00            | 0.00                                | 0.67         | 24                      |
| <b>1EVM</b>   | 0.50             | 0.00            | 0.00            | 0.00                                | 0.50         | 16                      |
| <b>1FQP</b>   | 0.11             | 0.11            | 0.11            | 0.56                                | 0.11         | 18                      |
| <b>1I34</b>   | 0.05             | 0.11            | 0.11            | 0.53                                | 0.21         | 19                      |
| <b>1LVS</b>   | 0.00             | 0.25            | 0.20            | 0.50                                | 0.05         | 20                      |
| <b>1NP9</b>   | 0.33             | 0.00            | 0.00            | 0.00                                | 0.67         | 24                      |
| <b>1XAV</b>   | 0.38             | 0.00            | 0.00            | 0.00                                | 0.62         | 21                      |
| <b>139D</b>   | 0.50             | 0.00            | 0.00            | 0.00                                | 0.50         | 24                      |
| <b>148D</b>   | 0.07             | 0.14            | 0.14            | 0.57                                | 0.07         | 14                      |
| <b>186D</b>   | 0.22             | 0.13            | 0.09            | 0.26                                | 0.30         | 23                      |
| <b>201D</b>   | 0.00             | 0.22            | 0.22            | 0.56                                | 0.00         | 27                      |
| <b>156D</b>   | 0.00             | 0.27            | 0.27            | 0.45                                | 0.00         | 22                      |
| <b>1S45</b>   | 0.60             | 0.00            | 0.00            | 0.00                                | 0.40         | 20                      |
| <b>2AVH</b>   | 0.00             | 0.30            | 0.30            | 0.40                                | 0.00         | 20                      |
| <b>2GKU</b>   | 0.13             | 0.13            | 0.04            | 0.35                                | 0.35         | 23                      |
| <b>2HY9</b>   | 0.12             | 0.12            | 0.04            | 0.32                                | 0.40         | 25                      |
| <b>2JSM</b>   | 0.14             | 0.14            | 0.05            | 0.36                                | 0.32         | 22                      |
| <b>2JPZ</b>   | 0.12             | 0.12            | 0.04            | 0.32                                | 0.40         | 25                      |
| <b>2JSL</b>   | 0.13             | 0.13            | 0.04            | 0.33                                | 0.38         | 24                      |
| <b>2KF8</b>   | 0.14             | 0.10            | 0.14            | 0.57                                | 0.05         | 21                      |
| <b>2KKA</b>   | 0.14             | 0.09            | 0.09            | 0.55                                | 0.14         | 22                      |
| <b>2LD8</b>   | 0.36             | 0.00            | 0.00            | 0.00                                | 0.64         | 22                      |
| <b>143D</b>   | 0.00             | 0.19            | 0.19            | 0.57                                | 0.05         | 21                      |

**Table S5.** Predicted fractions of secondary structural elements, anti-anti, syn-anti, anti-syn,diagonal+lateral loops and other , by leave-one-out cross-validation constrained least-squares fitting of the CD spectra of G-quadruplex. The goodness of the prediction for each quadruplex was evaluated by structural RMSD, spectral RMSD and the spectral NRMSD .

|             | anti-anti | syn-anti | anti-syn | Diagonal<br>+ lateral<br>loops | Other | Total | Structural<br>RMSD | Spectral<br>NRMSD |
|-------------|-----------|----------|----------|--------------------------------|-------|-------|--------------------|-------------------|
| <b>1EMQ</b> | 0.38      | 0.01     | 0.00     | 0.08                           | 0.52  | 0.99  | 0.08               | 0.04              |
| <b>1EVM</b> | 0.40      | 0.04     | 0.06     | 0.10                           | 0.39  | 0.99  | 0.08               | 0.03              |
| <b>1FQP</b> | 0.14      | 0.14     | 0.14     | 0.30                           | 0.27  | 0.99  | 0.14               | 0.11              |
| <b>1I34</b> | 0.09      | 0.20     | 0.24     | 0.48                           | 0.00  | 1.01  | 0.12               | 0.02              |
| <b>1LVS</b> | 0.06      | 0.17     | 0.17     | 0.39                           | 0.21  | 0.99  | 0.10               | 0.07              |
| <b>1NP9</b> | 0.48      | 0.00     | 0.00     | 0.00                           | 0.51  | 0.99  | 0.10               | 0.02              |
| <b>1XAV</b> | 0.40      | 0.00     | 0.02     | 0.02                           | 0.55  | 0.99  | 0.04               | 0.04              |
| <b>139D</b> | 0.46      | 0.04     | 0.00     | 0.00                           | 0.51  | 1.01  | 0.03               | 0.08              |
| <b>148D</b> | 0.15      | 0.12     | 0.12     | 0.31                           | 0.29  | 0.99  | 0.16               | 0.15              |
| <b>186D</b> | 0.22      | 0.12     | 0.12     | 0.36                           | 0.19  | 1.01  | 0.07               | 0.07              |
| <b>201D</b> | 0.08      | 0.16     | 0.15     | 0.36                           | 0.24  | 0.99  | 0.15               | 0.06              |
| <b>156D</b> | 0.00      | 0.23     | 0.26     | 0.52                           | 0.00  | 1.01  | 0.04               | 0.10              |
| <b>1S45</b> | 0.49      | 0.00     | 0.00     | 0.00                           | 0.52  | 1.01  | 0.07               | 0.02              |
| <b>2AVH</b> | 0.00      | 0.21     | 0.17     | 0.64                           | 0.00  | 1.01  | 0.13               | 0.06              |
| <b>2GKU</b> | 0.06      | 0.14     | 0.08     | 0.47                           | 0.26  | 1.01  | 0.08               | 0.03              |
| <b>2HY9</b> | 0.16      | 0.14     | 0.11     | 0.27                           | 0.31  | 0.99  | 0.06               | 0.03              |
| <b>2JSM</b> | 0.11      | 0.13     | 0.07     | 0.41                           | 0.27  | 0.99  | 0.04               | 0.01              |
| <b>2JPZ</b> | 0.17      | 0.12     | 0.07     | 0.36                           | 0.30  | 1.01  | 0.06               | 0.02              |
| <b>2JSL</b> | 0.14      | 0.12     | 0.08     | 0.39                           | 0.25  | 0.99  | 0.07               | 0.02              |
| <b>2KF8</b> | 0.10      | 0.15     | 0.09     | 0.47                           | 0.20  | 1.01  | 0.09               | 0.03              |
| <b>2KKA</b> | 0.11      | 0.16     | 0.11     | 0.45                           | 0.18  | 1.01  | 0.06               | 0.02              |
| <b>2LD8</b> | 0.34      | 0.03     | 0.00     | 0.11                           | 0.51  | 0.99  | 0.08               | 0.03              |
| <b>143D</b> | 0.09      | 0.17     | 0.18     | 0.32                           | 0.23  | 0.99  | 0.14               | 0.10              |

**Table S6.** Overall performance of the prediction method for the secondary structural elements of G-quadruplex, anti-anti, syn-anti, anti-syn, diagonal+lateral loops and other predicted by leave-one-out cross-validation constrained least-squares fitting of the CD spectra of G-quadruplex. The linear fits are shown in Figure 6 in the text.

|                                                 | anti-anti | syn-anti | anti-syn | Diagonal<br>+ lateral<br>loops | other |
|-------------------------------------------------|-----------|----------|----------|--------------------------------|-------|
| Structural std of PDB ( $\sigma_{\text{PDB}}$ ) | 0.180     | 0.092    | 0.093    | 0.231                          | 0.233 |
| mean PDB                                        | 0.190     | 0.111    | 0.090    | 0.313                          | 0.297 |
| $\xi$ parameter <sup>[10b]</sup>                | 2.91      | 2.13     | 1.84     | 1.77                           | 1.75  |
| Structural RMSD                                 | 0.06      | 0.04     | 0.05     | 0.13                           | 0.13  |
| R Pearson                                       | 0.94      | 0.88     | 0.83     | 0.82                           | 0.82  |
| Slope                                           | 1.06      | 1.14     | 1.02     | 1.00                           | 1.13  |

$\sigma_{\text{PDB}}$ = structural standard deviation observed in the PDB files.  $\xi = \sigma_{\text{PDB}}/\text{RMSD structural}$ .<sup>[10b]</sup>

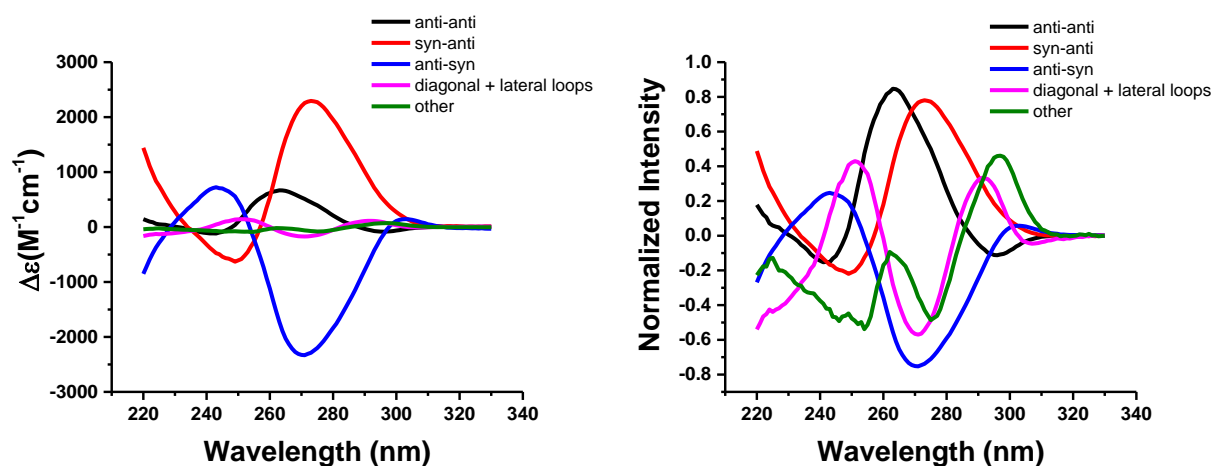

**Figure S8.** Secondary structure basis components CD spectra of G-quadruplex used for the fitting to obtain the secondary structural elements anti-anti, syn-anti, anti-syn, diagonal and lateral loops A) The intensity of the CD spectra was expressed as  $\Delta\epsilon$  ( $\text{M}^{-1} \text{cm}^{-1}$ ) =  $\theta(\text{mdeg})/(32980 * c(\text{mol/Liter}) * L(\text{cm}))$  where  $c$ = concentration per quadruplex in mol/Liter. B) Normalized basis spectra.



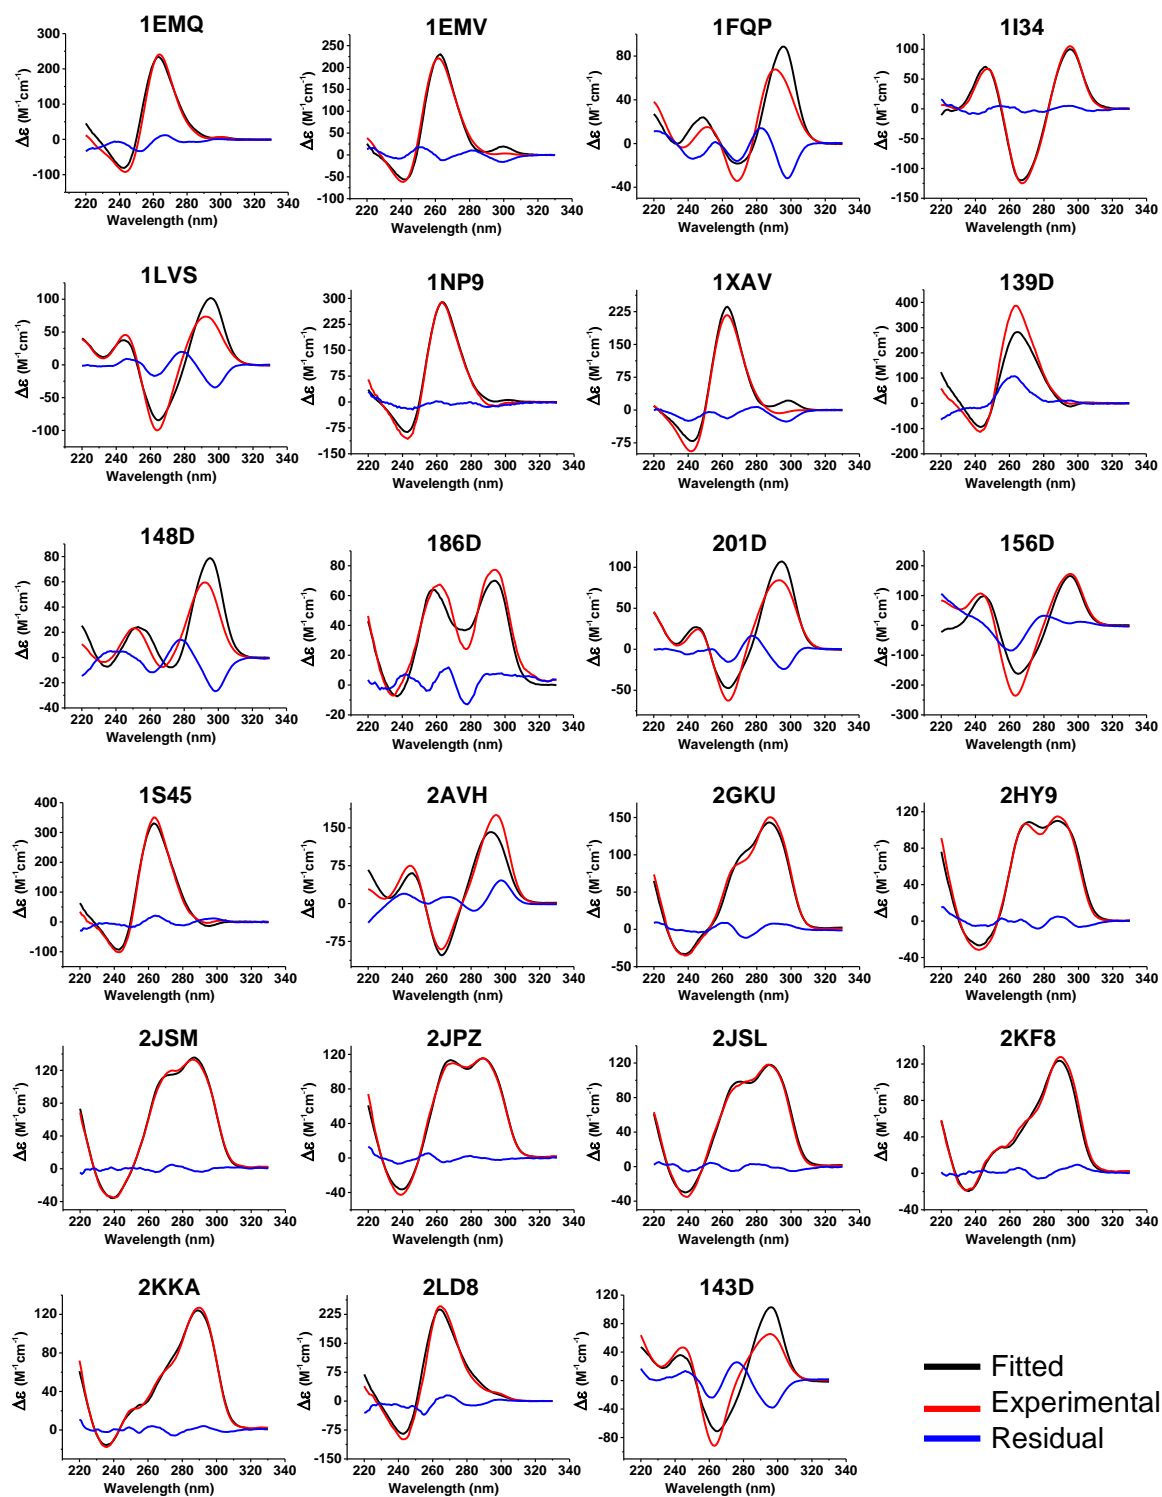

**Figure S9.** Experimental (red), reconstructed (black) and residual (blue) CD spectra for the 23 reference G-quadruplex obtained by leave-one-out cross-validation constrained least-squares fitting. The reconstructed CD spectra were calculated from the estimated fractions for the set of secondary structures elements ‘anti-anti’, ‘syn-anti’, ‘anti-syn’, ‘diagonal and lateral loops’ and ‘other’. The intensity of the CD spectra (330-220 nm) is expressed as  $\Delta\epsilon$  ( $M^{-1} \text{ cm}^{-1}$ ) per quadruplex.

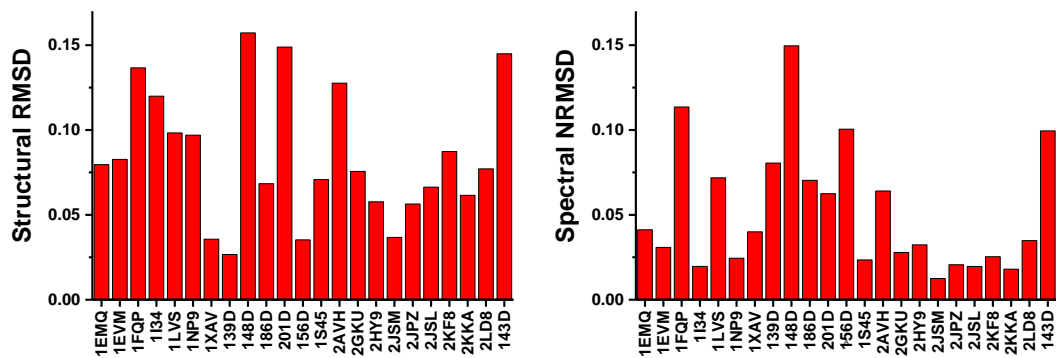

**Figure S10.** Quality of the prediction when the secondary structural elements ‘anti-anti’, ‘syn-anti’, ‘anti-syn’, ‘diagonal+lateral loops’ and ‘other’ were used for the 23 reference G-quadruplex. The structural RMSD and the spectral NRMSD were obtained by leave-one-out cross-validation using a constrained least-squares fitting.

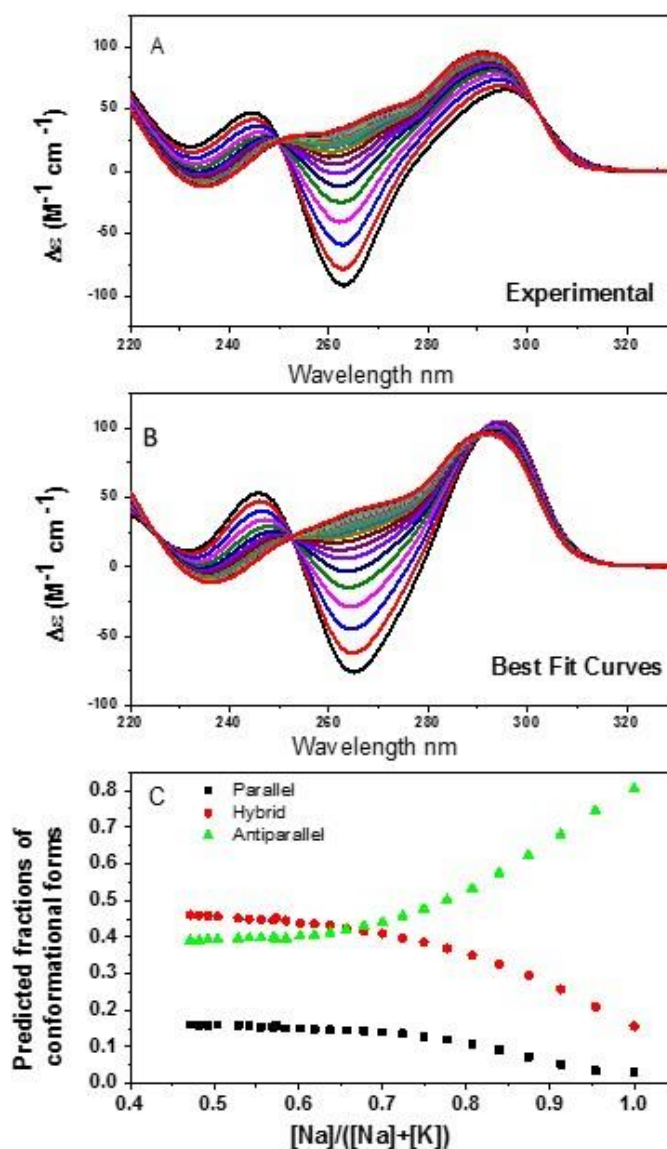

**Figure S11.** Characterization of the conformational heterogeneity of human telomere quadruplex solutions. CD spectra of the human telomere repeat sequence 5'AGGG(TTAGGG)<sub>3</sub> were recorded as a function of the mole fraction of NaCl + KCl as was fully described in reference 39 (panel A). As one referee pointed out to us, this sequence is known to form a mixture of conformational forms in solution and the exact fraction of each form is a matter of some debate. The reviewer asked that we demonstrate our analytical method by resolving the components of such mixtures. The experimental spectra were fit by nonlinear least-squares fitting to equation S3 using as basis spectra the average spectra shown in figure 1 in the text for the parallel, hybrid and antiparallel conformational forms, yielding estimates for the fraction of each form in the solution mixtures. The best-fit curves are shown in panel B. Panel C show the estimated fractions of the three conformational forms as a function of the mole fraction Na obtained by the analysis. At a mole fraction of 1.0, the results show that the CD spectrum arises from a mixture of approximately 80% antiparallel, 16% hybrid, and 3% parallel conformations. At >0.5 mole fraction Na, the mixture changes to approximately 39% antiparallel, 46% hybrid, and 16% parallel conformations. This analysis illustrates that our approach can successfully resolve the spectral components of CD spectra of mixtures of quadruplex conformational forms.

## 9. References

- [1] R. del Villar-Guerra, R. D. Gray and J. B. Chaires, *Curr. Protoc. Nucleic Acid Chem.* 68:17.8.1-17.8.16. **2017**.
- [2] a) N. C. Garbett, C. S. Mekmaysy and J. B. Chaires in *Sedimentation Velocity Ultracentrifugation Analysis for Hydrodynamic Characterization of G-Quadruplex Structures*, (Ed. P. Baumann), Humana Press, Totowa, NJ, **2010**, pp. 97-120; b) J. B. Chaires, W. L. Dean, H. T. Le and J. O. Trent in *Chapter Thirteen - Hydrodynamic Models of G-Quadruplex Structures, Vol. Volume 562* (Ed. L. C. James), Academic Press, **2015**, pp. 287-304.
- [3] a) M. C. Miller, C. J. Ohrenberg, A. Kuttan and J. O. Trent, *Curr. Protoc. Nucleic Acid Chem.* 61:17.7.1-17.7.18. **2015**; b) M. C. Miller and J. O. Trent, *Curr. Protoc. Nucleic Acid Chem.* 45:17.3.1-17.3.18 **2011**.
- [4] a) A. I. Karsiotis, C. O'Kane and M. Webba da Silva, *Methods* **2013**, 64, 28-35; b) M. Webba da Silva, *Chemistry A-European Journal* **2007**, 13, 9738-9745; c) S. Burge, G. N. Parkinson, P. Hazel, A. K. Todd and S. Neidle, *Nucleic Acids Research* **2006**, 34, 5402-5415.
- [5] *R Core Team (2013). R: A Language and Environment for Statistical Computing. R Foundation for Statistical Computing, Vienna, Austria. URL <http://www.R-project.org/>.*
- [6] S. Le, J. Josse and F. Husson, *Journal of Statistical Software* **2008**, 25, 1-18.
- [7] F. Husson, J. Josse and J. Pagès, *Principal component methods—hierarchical clustering - partitional clustering: why would we need to choose for visualizing data? Technical Report—Agrocampus (2010)* **2010**.
- [8] T. Feuillet, D. Mercier, A. Decaulne and E. Cossart, *Geomorphology* **2012**, 139–140, 577-587.
- [9] a) L. A. Compton and W. C. Johnson Jr, *Analytical Biochemistry* **1986**, 155, 155-167; b) R. D. Gray and J. B. Chaires in *Analysis of Multidimensional G-Quadruplex Melting Curves*, John Wiley & Sons, Inc.: Hoboken, NJ, **2011**; **Chapter 17, Unit 17.4**.
- [10] a) P. Manavalan and W. C. Johnson, *Journal of Biosciences* **1985**, 8, 141-149; b) J. G. Lees, A. J. Miles, F. Wien and B. A. Wallace, *Bioinformatics* **2006**, 22, 1955-1962; c) T. Konno, *Protein Sci.* **1998**, 7, 975-982.
- [11] a) J. P. Hennessey and W. C. Johnson, *Biochemistry* **1981**, 20, 1085-1094; b) N. Sreerama, S. Y. Venyaminov and R. W. Woody, *Protein Sci.* **1999**, 8, 370-380; c) L. A. Compton, C. K. Mathews and W. C. Johnson, *Journal of Biological Chemistry* **1987**, 262, 13039-13043.
- [12] J. P. Hennessey and G. A. Scarborough, *Journal of Biological Chemistry* **1988**, 263, 3123-3130.
- [13] K. A. Oberg, J.-M. Ruyschaert and E. Goormaghtigh, *European Journal of Biochemistry* **2004**, 271, 2937-2948.
- [14] V. Hall, M. Sklepari and A. Rodger, *Chirality* **2014**, 26, 471-482.
- [15] L. Whitmore and B. A. Wallace, *Nucleic Acids Research* **2004**, 32, W668-W673.
- [16] P. K. Patel and R. V. Hosur, *Nucleic Acids Research* **1999**, 27, 2457-2464.
- [17] P. K. Patel, A. S. R. Koti and R. V. Hosur, *Nucleic Acids Research* **1999**, 27, 3836-3843.
- [18] M. A. Keniry, G. D. Strahan, E. A. Owen and R. H. Shafer, *European Journal of Biochemistry* **1995**, 233, 631-643.
- [19] V. Kuryavyi, A. Majumdar, A. Shallop, N. Chernichenko, E. Skripkin, R. Jones and D. J. Patel, *Journal of Molecular Biology* **2001**, 310, 181-194.
- [20] M. Črnugeč, N. V. Hud and J. Plavec, *Journal of Molecular Biology* **2002**, 320, 911-924.
- [21] E. Gavathiotis and M. S. Searle, *Organic & Biomolecular Chemistry* **2003**, 1, 1650-1656.
- [22] A. Ambrus, D. Chen, J. Dai, R. A. Jones and D. Yang, *Biochemistry* **2005**, 44, 2048-2058.
- [23] Y. Wang and D. J. Patel, *Journal of Molecular Biology* **1993**, 234, 1171-1183.
- [24] P. Schultze, R. F. Macaya and J. Feigon, *Journal of Molecular Biology* **1994**, 235, 1532-1547.
- [25] Y. Wang and D. J. Patel, *Structure* **1994**, 2, 1141-1156.
- [26] Y. Wang and D. J. Patel, *Journal of Molecular Biology* **1995**, 251, 76-94.
- [27] P. Schultze, F. W. Smith and J. Feigon, *Structure* **1994**, 2, 221-233.
- [28] C. Cáceres, G. Wright, C. Gouyette, G. Parkinson and J. A. Subirana, *Nucleic Acids Research* **2004**, 32, 1097-1102.
- [29] P. Hazel, G. N. Parkinson and S. Neidle, *Journal of the American Chemical Society* **2006**, 128, 5480-5487.
- [30] R. Buscaglia, R. D. Gray and J. B. Chaires, *Biopolymers* **2013**, 99, 1006-1018.
- [31] K. N. Luu, A. T. Phan, V. Kuryavyi, L. Lacroix and D. J. Patel, *Journal of the American Chemical Society* **2006**, 128, 9963-9970.
- [32] J. Dai, C. Punchihewa, A. Ambrus, D. Chen, R. A. Jones and D. Yang, *Nucleic Acids Research* **2007**, 35, 2440-2450.
- [33] A. T. Phan, V. Kuryavyi, K. N. Luu and D. J. Patel, *Nucleic Acids Research* **2007**, 35, 6517-6525.
- [34] J. Dai, M. Carver, C. Punchihewa, R. A. Jones and D. Yang, *Nucleic Acids Research* **2007**, 35, 4927-4940.
- [35] K. W. Lim, S. Amrane, S. Bouaziz, W. Xu, Y. Mu, D. J. Patel, K. N. Luu and A. T. Phan, *Journal of the American Chemical Society* **2009**, 131, 4301-4309.
- [36] Z. Zhang, J. Dai, E. Veliath, R. A. Jones and D. Yang, *Nucleic Acids Research* **2010**, 38, 1009-1021.
- [37] B. Heddi and A. T. Phan, *Journal of the American Chemical Society* **2011**, 133, 9824-9833.
- [38] Y. Wang and D. J. Patel, *Structure* **1993**, 1, 263-282
- [39] R. D. Gray, R. D. Li, J. and Chaires, J. B., *Journal of Physical Chemistry B* **2009** 113, 2676-2683

## Author Contributions

R.V-G. designed experiments, collected data, analyzed data, wrote the analysis program code and wrote the manuscript.  
J.O.T. and J.B.C administered the project, designed experiments, analyzed data and wrote the manuscript.
